# Supplementary material for: AAV-Mediated CAG-Targeting Selectively Reduces Polyglutamine-Expanded Protein and Attenuates Disease Phenotypes in a Spinocerebellar Ataxia Mouse Model
Source: MDPI journal article supplement (doi:10.3390/ijms25084354), 2024-04-15
Supplement: s1 [file s1]

**Supplementary Table S1: Potential off-targets of CAG targeting shRNAs.**

| Reagent            | Gene name             | Description                                                    | Length (nt)* | Off-target level** | Brain Expression# | Other tissues#    |
|--------------------|-----------------------|----------------------------------------------------------------|--------------|--------------------|-------------------|-------------------|
| <b>A2</b>          | <i>Ccdc177</i>        | Coiled-coil domain containing 177                              | 21           | 1                  | very low          | very low          |
|                    | <i>Maml1</i>          | Mastermind like transcriptional coactivator 1                  | 21           | 1                  | low               | broad & low       |
|                    | <i>Ppp1r3f</i>        | Protein phosphatase 1 regulatory subunit 3F                    | 21           | 1                  | medium            | very low          |
|                    | <i>Golga4</i>         | Golgin A4                                                      | 20           | 1                  | very low          | broad & low       |
|                    | <i>Soga3</i>          | SOGA family member 3                                           | 20           | 1                  | very low          | very low          |
|                    | <i>Th</i>             | Tyrosine hydroxylase                                           | 20           | 1                  | specific & high   | very low          |
|                    | <i>Mink1</i>          | Misshapen like kinase 1                                        | 20           | 2                  | high              | broad & high      |
| <b>A4</b>          | <i>Stc1</i>           | Stanniocalcin 1                                                | 21           | 1                  | very low          | specific & medium |
|                    | <i>A2230006KO3Rik</i> |                                                                | 20           | 1                  |                   |                   |
|                    | <i>Pum1</i>           | Pumilio RNA binding family member 1                            | 20           | 1                  | medium            | broad & medium    |
|                    | <i>D6Etd527e</i>      |                                                                | 20           | 2                  |                   |                   |
|                    | <i>Mad111</i>         | Mitotic arrest deficient 1 like 1                              | 20           | 2                  | very low          | broad and low     |
|                    | <i>Tbl1x</i>          | Transducin beta like 1 X-linked                                | 20           | 2                  | very low          | broad & low       |
|                    | <i>Zfp853</i>         | Zinc Finger Protein 853                                        | 20           | 2                  | low               | broad & low       |
| <b>A15</b>         | <i>none</i>           |                                                                |              |                    |                   |                   |
| <b>AG4</b>         | <i>Ccdc177</i>        | Coiled-coil domain containing 177                              | 20           | 2                  | very low          | very low          |
|                    | <i>Lrch3</i>          | Leucine rich repeats and calponin homology domain containing 3 | 20           | 2                  | low               | broad & low       |
|                    | <i>Maml1</i>          | Mastermind like transcriptional coactivator 1                  | 20           | 2                  | low               | broad & low       |
|                    | <i>Ppp1r3f</i>        | Protein phosphatase 1 regulatory subunit 3F                    | 20           | 2                  | medium            | very low          |
|                    | <i>Stc1</i>           | Stanniocalcin 1                                                | 20           | 2                  | very low          | specific & medium |
| <b>A4(P10,11A)</b> | <i>Kmt2d</i>          | Lysine methyltransferase 2D                                    | 20           | 2                  | low               | broad & low       |

\* Number of matched nucleotides out of 21, with cut-off 19 and less.

\*\* According to Blast bit-score, with level 1 > 40, and level 2 between 34 to 40.

# Expression source : [www.gtexportal.org](http://www.gtexportal.org)
