# Supplementary material for: AAV-Mediated CAG-Targeting Selectively Reduces Polyglutamine-Expanded Protein and Attenuates Disease Phenotypes in a Spinocerebellar Ataxia Mouse Model
Source: Int J Mol Sci. 2024 Apr 15;25(8):4354. doi: 10.3390/ijms25084354 (PMC11050704; doi:10.3390/ijms25084354)
Supplement: Supplementary file 1 [file ijms-25-04354-s001.zip]

Archive with 5 entries (5 files):
- Figures S1-S8_Niewiadomska_Cimicka.pdf
- Table S1_Niewiadomska_Cimicka.pdf
- Table S2_Niewiadomska_Cimicka.xlsx
- Table S3_Niewiadomska_Cimicka.xlsx
- Uncropped Western blots.pdf
