# Supplementary material for: AAV-Mediated CAG-Targeting Selectively Reduces Polyglutamine-Expanded Protein and Attenuates Disease Phenotypes in a Spinocerebellar Ataxia Mouse Model
Source: Int J Mol Sci. 2024 Apr 15;25(8):4354. doi: 10.3390/ijms25084354 (PMC11050704; doi:10.3390/ijms25084354)
Supplement: Supplementary file 1 [file ijms-25-04354-s001.zip › Table S2_Niewiadomska_Cimicka.xlsx]

## Sheet: Feuil1
Supplementary Table S2: List of differentially expressed protein coding genes into the cerebellum of wild-type mice treated with AAV-shA4 versus untreated, with |Log2 fold change (FC)| > 0.385 (adjusted p <0.05).
Ensembl Gene ID	Gene symbol	Description	Log2 FC (WT_A4 vs WT_NT)	Adjusted p-value	GO:biological process	GO:molecular function	GO:cellular component
ENSMUSG00000066842	Hmcn1	hemicentin 1	0.639579	8.29337e-05	response to bacterium; cell cycle; cell division; homophilic cell adhesion via plasma membrane adhesion molecules; heterophilic cell-cell adhesion via plasma membrane cell adhesion molecules	calcium ion binding; extracellular matrix structural constituent	cytoplasm; cell junction; extracellular region; collagen-containing extracellular matrix; adherens junction; basement membrane; cell cortex; cleavage furrow
ENSMUSG00000108841	Frmpd2	FERM and PDZ domain containing 2	0.622805	0.00187362	bicellular tight junction assembly	1-phosphatidylinositol binding; protein binding	basolateral plasma membrane; bicellular tight junction; cytoskeleton
ENSMUSG00000055866	Per2	period circadian clock 2	0.601692	0.00182532	rhythmic process; negative regulation of transcription by RNA polymerase II; circadian rhythm; negative regulation of transcription, DNA-templated	protein binding	nucleus; cytoplasm
ENSMUSG00000048376	F2r	coagulation factor II (thrombin) receptor	0.599152	0.0013602	homeostasis of number of cells within a tissue; G protein-coupled receptor signaling pathway; signal transduction; positive regulation of transcription, DNA-templated; regulation of sensory perception of pain; inflammatory response; positive regulation of interleukin-6 production; positive regulation of interleukin-8 production; response to lipopolysaccharide; positive regulation of GTPase activi…	G protein-coupled receptor activity; signaling receptor binding; thrombin-activated receptor activity; G-protein alpha-subunit binding; G-protein beta-subunit binding; heterotrimeric G-protein binding	membrane; integral component of membrane; plasma membrane; cell surface; integral component of plasma membrane; postsynaptic membrane; neuromuscular junction; early endosome; late endosome; caveola; platelet dense tubular network
ENSMUSG00000020014	Cfap54	cilia and flagella associated protein 54	0.585841	0.00557674	spermatogenesis; cell differentiation; cell projection organization; cilium assembly; cilium movement involved in cell motility		cytoplasm; cytoskeleton; cell projection; cilium; axoneme
ENSMUSG00000038011	Dnah10	dynein, axonemal, heavy chain 10	0.576506	0.00557674	microtubule-based movement; cilium movement	ATP binding; nucleotide binding; ATP-dependent microtubule motor activity, minus-end-directed; dynein intermediate chain binding; dynein light intermediate chain binding; motor activity; microtubule motor activity	cytoplasm; dynein complex; inner dynein arm; cytoskeleton; cell projection; microtubule; axoneme; cilium
ENSMUSG00000035860	Cdhr3	cadherin-related family member 3	0.558404	0.00895461	homophilic cell adhesion via plasma membrane adhesion molecules; cell adhesion	calcium ion binding	membrane; integral component of membrane; plasma membrane; integral component of plasma membrane
ENSMUSG00000052273	Dnah3	dynein, axonemal, heavy chain 3	0.548622	0.00953596	microtubule-based movement	ATP binding; nucleotide binding; motor activity; ATP-dependent microtubule motor activity, minus-end-directed; microtubule motor activity; dynein intermediate chain binding; dynein light intermediate chain binding	cytoplasm; cytoskeleton; cell projection; dynein complex; microtubule; cilium; inner dynein arm
ENSMUSG00000032446	Eomes	eomesodermin	0.545096	0.0124138	regulation of transcription, DNA-templated; regulation of gene expression; multicellular organism development; positive regulation of transcription by RNA polymerase II; negative regulation of transcription by RNA polymerase II; immune system process; skeletal muscle cell differentiation; cell differentiation; regulation of transcription by RNA polymerase II; brain development; endoderm developme…	DNA-binding transcription factor activity; DNA binding; chromatin binding; RNA polymerase II transcription regulatory region sequence-specific DNA binding; DNA-binding transcription factor activity, RNA polymerase II-specific; sequence-specific DNA binding; DNA-binding transcription repressor activity, RNA polymerase II-specific; RNA polymerase II activating transcription factor binding; sequence…	nucleus; nuclear chromatin
ENSMUSG00000037716	Ccdc33	coiled-coil domain containing 33	0.533367	0.00557674	spermatogenesis		peroxisome
ENSMUSG00000035539	Ccdc180	coiled-coil domain containing 180	0.531008	0.00953596
ENSMUSG00000047361	Gm973	predicted gene 973	0.51826	0.0172056
ENSMUSG00000024552	Slc14a2	solute carrier family 14 (urea transporter), member 2	0.515469	0.0072449	urea transmembrane transport	urea transmembrane transporter activity; cell adhesion molecule binding	membrane; integral component of membrane; plasma membrane
ENSMUSG00000070306	Ccdc153	coiled-coil domain containing 153	0.511699	0.00953596		identical protein binding
ENSMUSG00000050534	Htr5b	5-hydroxytryptamine (serotonin) receptor 5B	0.504477	0.00187362	G protein-coupled receptor signaling pathway; signal transduction; G protein-coupled serotonin receptor signaling pathway; serotonin receptor signaling pathway	G protein-coupled receptor activity; G protein-coupled serotonin receptor activity; drug binding; serotonin binding	membrane; integral component of membrane; plasma membrane; integral component of plasma membrane
ENSMUSG00000025887	Casp12	caspase 12	0.500362	0.0070668	proteolysis; regulation of apoptotic process; apoptotic process; positive regulation of cysteine-type endopeptidase activity involved in apoptotic process; positive regulation of apoptotic process; execution phase of apoptosis; protein autoprocessing; intrinsic apoptotic signaling pathway in response to endoplasmic reticulum stress; positive regulation of striated muscle cell apoptotic process; e…	hydrolase activity; protein binding; cysteine-type endopeptidase activity; peptidase activity; cysteine-type peptidase activity; endopeptidase activity; protease binding; cysteine-type endopeptidase activity involved in apoptotic signaling pathway	nucleus; cytosol; intracellular membrane-bounded organelle; cytoplasm; endoplasmic reticulum; IPAF inflammasome complex; NLRP3 inflammasome complex; AIM2 inflammasome complex
ENSMUSG00000037627	Rgs22	regulator of G-protein signalling 22	0.499975	0.011386	regulation of signal transduction; negative regulation of signal transduction	G-protein alpha-subunit binding	nucleus; cytoplasm
ENSMUSG00000036040	Adamtsl2	ADAMTS-like 2	0.480299	0.0418092	proteolysis; extracellular matrix organization; negative regulation of transforming growth factor beta receptor signaling pathway; lobar bronchus epithelium development	protein binding; metalloendopeptidase activity; microfibril binding	extracellular region; extracellular matrix
ENSMUSG00000050919	Zfp366	zinc finger protein 366	0.473311	0.00187362	negative regulation of transcription by RNA polymerase II; regulation of transcription by RNA polymerase II; response to estrogen; negative regulation of intracellular estrogen receptor signaling pathway	metal ion binding; DNA binding; DNA-binding transcription factor activity; RNA polymerase II cis-regulatory region sequence-specific DNA binding; transcription corepressor activity; estrogen receptor binding	nucleus; nuclear chromatin
ENSMUSG00000043164	Tmem212	transmembrane protein 212	0.463055	0.0401679			membrane; integral component of membrane
ENSMUSG00000040183	Ankrd6	ankyrin repeat domain 6	0.442995	0.0270747	negative regulation of canonical Wnt signaling pathway; positive regulation of Wnt signaling pathway, planar cell polarity pathway; positive regulation of JNK cascade	protein binding	nucleus; cytoplasm; intracellular membrane-bounded organelle
ENSMUSG00000033849	B3galt2	UDP-Gal:betaGlcNAc beta 1,3-galactosyltransferase, polypeptide 2	0.441042	0.0072449	protein glycosylation; poly-N-acetyllactosamine biosynthetic process; galactosylceramide biosynthetic process; oligosaccharide biosynthetic process	transferase activity; transferase activity, transferring glycosyl groups; acetylglucosaminyltransferase activity; acetylgalactosaminyltransferase activity; N-acetyllactosaminide beta-1,3-N-acetylglucosaminyltransferase activity; transferase activity, transferring hexosyl groups; UDP-galactose:beta-N-acetylglucosamine beta-1,3-galactosyltransferase activity; glucosaminylgalactosylglucosylceramide …	membrane; integral component of membrane; Golgi membrane; Golgi apparatus
ENSMUSG00000037035	Inhbb	inhibin beta-B	0.440109	0.00866855	negative regulation of insulin secretion; response to wounding; cellular response to cholesterol; eye development; cellular response to insulin stimulus; fat cell differentiation; positive regulation of apoptotic signaling pathway; positive regulation of pathway-restricted SMAD protein phosphorylation; SMAD protein signal transduction; cellular response to starvation; positive regulation of folli…	growth factor activity; protein homodimerization activity; cytokine activity; hormone activity; protein-containing complex binding; inhibin binding	extracellular space; cell periphery; perinuclear region of cytoplasm; extracellular region; inhibin B complex
ENSMUSG00000044772	Sntn	sentan, cilia apical structure protein	0.397934	0.0221978		transition metal ion binding; calcium ion binding; calcium-dependent protein binding	cell projection; cilium
ENSMUSG00000022449	Adamts20	a disintegrin-like and metallopeptidase (reprolysin type) with thrombospondin type 1 motif, 20	0.396598	0.0392792	proteolysis; negative regulation of apoptotic process; extracellular matrix organization; positive regulation of melanocyte differentiation; regulation of developmental pigmentation; positive regulation of signal transduction	zinc ion binding; metal ion binding; hydrolase activity; peptidase activity; metallopeptidase activity; metalloendopeptidase activity; endopeptidase activity	extracellular space; extracellular region; extracellular matrix
ENSMUSG00000001995	Sipa1l2	signal-induced proliferation-associated 1 like 2	0.393684	0.0129636	positive regulation of GTPase activity; regulation of small GTPase mediated signal transduction	GTPase activator activity; protein binding
ENSMUSG00000009281	Rarres2	retinoic acid receptor responder (tazarotene induced) 2	0.39186	0.0376015	regulation of lipid catabolic process; inflammatory response; cell differentiation; retinoid metabolic process; positive regulation of protein phosphorylation; insulin receptor signaling pathway; positive regulation of macrophage chemotaxis; antifungal humoral response; innate immune response; embryonic digestive tract development; defense response to Gram-negative bacterium; defense response to …	signaling receptor binding; protein binding	extracellular region; extracellular space; collagen-containing extracellular matrix; extracellular matrix
ENSMUSG00000061533	Cep128	centrosomal protein 128	0.389464	0.0479421	protein localization		cytoplasm; cytoskeleton; centriole; spindle pole; centriolar subdistal appendage
ENSMUSG00000037805	Rpl10a	ribosomal protein L10A	-0.390413	0.0376015	translation	structural constituent of ribosome; RNA binding	large ribosomal subunit; ribosome
ENSMUSG00000087006	Gm13889	predicted gene 13889	-0.404651	0.0402743
ENSMUSG00000026077	Npas2	neuronal PAS domain protein 2	-0.418462	0.0225045	regulation of transcription, DNA-templated; positive regulation of DNA repair; positive regulation of transcription, DNA-templated; positive regulation of transcription by RNA polymerase II; response to redox state; negative regulation of cell death; regulation of response to DNA damage stimulus	protein dimerization activity; DNA-binding transcription factor activity; DNA binding; Hsp90 protein binding; sequence-specific double-stranded DNA binding	nucleus; transcription regulator complex; cytoplasm; nucleoplasm; cytosol
ENSMUSG00000037095	Lrg1	leucine-rich alpha-2-glycoprotein 1	-0.446823	0.0451295	response to bacterium; positive regulation of transforming growth factor beta receptor signaling pathway; positive regulation of angiogenesis; brown fat cell differentiation; positive regulation of endothelial cell proliferation	transforming growth factor beta receptor binding; protein binding	extracellular space; intracellular membrane-bounded organelle
ENSMUSG00000053399	Adamts18	a disintegrin-like and metallopeptidase (reprolysin type) with thrombospondin type 1 motif, 18	-0.450596	0.00675199	proteolysis; extracellular matrix organization; eye development; negative regulation of platelet aggregation	metal ion binding; hydrolase activity; peptidase activity; metallopeptidase activity; metalloendopeptidase activity	extracellular region; extracellular matrix; nucleus
ENSMUSG00000050105	Grrp1	glycine/arginine rich protein 1	-0.517762	0.0163393
ENSMUSG00000045725	Prr15	proline rich 15	-0.541577	0.0122727	multicellular organism development
ENSMUSG00000026822	Lcn2	lipocalin 2	-0.791142	6.83204e-22	defense response to bacterium; ion transport; response to bacterium; positive regulation of gene expression; immune system process; innate immune response; response to drug; extrinsic apoptotic signaling pathway in absence of ligand; apoptotic process; response to virus; positive regulation of cold-induced thermogenesis; cellular response to hydrogen peroxide; iron ion homeostasis; positive regul…	identical protein binding; odorant binding; protein binding; small molecule binding; iron ion binding; protease binding; enterobactin binding	extracellular space; cytosol; cytoplasmic vesicle; extracellular region; cytoplasmic vesicle lumen
6 gènes (CD74, H2-Eb1, H2-Ab1, H2-Aa, Myo1g and LCK) related to adaptative immune response and T-Cell regulation, were removed from the list, because they were upregulated in a single AAV-shA4-treated mouse, possibly following bacterial infection during viral administration.
