# Supplementary material for: AAV-Mediated CAG-Targeting Selectively Reduces Polyglutamine-Expanded Protein and Attenuates Disease Phenotypes in a Spinocerebellar Ataxia Mouse Model
Source: Int J Mol Sci. 2024 Apr 15;25(8):4354. doi: 10.3390/ijms25084354 (PMC11050704; doi:10.3390/ijms25084354)
Supplement: Supplementary file 1 [file ijms-25-04354-s001.zip › Table S3_Niewiadomska_Cimicka.xlsx]

## Sheet: Feuil4
Supplementary Table S3: List of significantly differentially expressed genes (DEGs) into the cerebellum of AAV-shSCR-treated SCA7 mice versus untreated wild-type mice with |Log2 fold change (FC)| > 0.385 (adjusted p <0.05) and comparison with significantly DEGs in the cerebellum of AAV-shA4-treated SCA7 mice versus untreated wild-type mice.
Ensembl Gene ID	Gene symbol	Description	Log2 FC (shSCR-SCA7 vs untreated WT)	Log2 FC (shA4-SCA7 vs untreated WT)
ENSMUSG00000007877	Tcap	titin-cap	-0.452793	-0.726853
ENSMUSG00000027376	Prom2	prominin 2	-0.435238	-0.658398
ENSMUSG00000049871	Nlrc3	NLR family, CARD domain containing 3	-0.424351	-0.627816
ENSMUSG00000000791	Il12rb1	interleukin 12 receptor, beta 1	0.531947	0.749799
ENSMUSG00000017697	Ada	adenosine deaminase	0.501986	0.702155
ENSMUSG00000002100	Mybpc3	myosin binding protein C, cardiac	-0.401564	-0.56153
ENSMUSG00000021108	Prkch	protein kinase C, eta	0.402322	0.558487
ENSMUSG00000018166	Erbb3	erb-b2 receptor tyrosine kinase 3	-0.41086	-0.53681
ENSMUSG00000029862	Clcn1	chloride channel, voltage-sensitive 1	-0.38754	-0.506253
ENSMUSG00000028943	Espn	espin	-0.387497	-0.502289
ENSMUSG00000031980	Agt	angiotensinogen (serpin peptidase inhibitor, clade A, member 8)	-0.386744	-0.50019
ENSMUSG00000025402	Nab2	Ngfi-A binding protein 2	-0.569175	-0.73312
ENSMUSG00000071341	Egr4	early growth response 4	-0.434646	-0.550999
ENSMUSG00000039168	Dap	death-associated protein	-0.432145	-0.545143
ENSMUSG00000031825	Crispld2	cysteine-rich secretory protein LCCL domain containing 2	-0.47506	-0.598878
ENSMUSG00000051517	Arhgef39	Rho guanine nucleotide exchange factor (GEF) 39	-0.52978	-0.667798
ENSMUSG00000024883	Rin1	Ras and Rab interactor 1	-0.399225	-0.502705
ENSMUSG00000041193	Pla2g5	phospholipase A2, group V	0.412422	0.516951
ENSMUSG00000029832	Nfe2l3	nuclear factor, erythroid derived 2, like 3	0.43271	0.533642
ENSMUSG00000018581	Dnah11	dynein, axonemal, heavy chain 11	-0.394717	-0.484533
ENSMUSG00000057948	Unc13d	unc-13 homolog D	-0.632254	-0.77264
ENSMUSG00000040536	Necab1	N-terminal EF-hand calcium binding protein 1	0.499769	0.609212
ENSMUSG00000044519	Zfp488	zinc finger protein 488	0.597847	0.725655
ENSMUSG00000027208	Fgf7	fibroblast growth factor 7	-0.461345	-0.559211
ENSMUSG00000110218	Gm20219	predicted gene, 20219	-0.392037	-0.472175
ENSMUSG00000034449	Dhrs11	dehydrogenase/reductase (SDR family) member 11	-0.495067	-0.593415
ENSMUSG00000029602	Rasal1	RAS protein activator like 1 (GAP1 like)	-0.917466	-1.09894
ENSMUSG00000036872	Abcc12	ATP-binding cassette, sub-family C (CFTR/MRP), member 12	-0.388952	-0.465744
ENSMUSG00000038540	Tmc3	transmembrane channel-like gene family 3	0.709774	0.843747
ENSMUSG00000025352	Gdf11	growth differentiation factor 11	-0.566657	-0.671578
ENSMUSG00000057604	Lmcd1	LIM and cysteine-rich domains 1	-0.53649	-0.635237
ENSMUSG00000001930	Vwf	Von Willebrand factor	0.522027	0.616909
ENSMUSG00000032323	Cyp11a1	cytochrome P450, family 11, subfamily a, polypeptide 1	-0.48009	-0.565708
ENSMUSG00000028115	Bnipl	BCL2/adenovirus E1B 19kD interacting protein like	-0.513562	-0.594431
ENSMUSG00000024866	Acy3	aspartoacylase (aminoacylase) 3	0.591257	0.683733
ENSMUSG00000060579	Fhit	fragile histidine triad gene	0.462527	0.53063
ENSMUSG00000030785	Cox6a2	cytochrome c oxidase subunit 6A2	-0.615157	-0.704854
ENSMUSG00000050063	Klk6	kallikrein related-peptidase 6	-0.581382	-0.665348
ENSMUSG00000064215	Ifi27	interferon, alpha-inducible protein 27	0.40677	0.464397
ENSMUSG00000034990	Otoa	otoancorin	-0.410967	-0.465939
ENSMUSG00000035486	Plk5	polo like kinase 5	-0.620863	-0.703714
ENSMUSG00000028369	Svep1	sushi, von Willebrand factor type A, EGF and pentraxin domain containing 1	-0.442551	-0.500526
ENSMUSG00000037833	Sh2d4b	SH2 domain containing 4B	-0.476924	-0.5394
ENSMUSG00000026950	Neb	nebulin	-0.434323	-0.490436
ENSMUSG00000046719	Nxph3	neurexophilin 3	-0.512674	-0.575693
ENSMUSG00000034265	Zdhhc14	zinc finger, DHHC domain containing 14	-0.503241	-0.561685
ENSMUSG00000032502	Stac	src homology three (SH3) and cysteine rich domain	-0.683389	-0.758609
ENSMUSG00000050335	Lgals3	lectin, galactose binding, soluble 3	0.392584	0.435248
ENSMUSG00000052920	Prkg1	protein kinase, cGMP-dependent, type I	-0.468291	-0.517364
ENSMUSG00000035200	Chrnb4	cholinergic receptor, nicotinic, beta polypeptide 4	-0.647066	-0.712639
ENSMUSG00000029436	Mmp17	matrix metallopeptidase 17	-0.422193	-0.461211
ENSMUSG00000063239	Grm4	glutamate receptor, metabotropic 4	-0.720675	-0.786764
ENSMUSG00000094840	Muc3a	mucin 3A, cell surface associated	-1.23068	-1.33682
ENSMUSG00000036334	Igsf10	immunoglobulin superfamily, member 10	0.649883	0.704695
ENSMUSG00000024910	Ctsw	cathepsin W	-0.447699	-0.484035
ENSMUSG00000020774	Aspa	aspartoacylase	-0.488792	-0.527658
ENSMUSG00000070720	Tmem200b	transmembrane protein 200B	-0.624794	-0.673937
ENSMUSG00000024857	Cabp2	calcium binding protein 2	-0.660161	-0.711889
ENSMUSG00000018634	Crhr1	corticotropin releasing hormone receptor 1	-0.557788	-0.600645
ENSMUSG00000031170	Slc38a5	solute carrier family 38, member 5	-0.396779	-0.427078
ENSMUSG00000039809	Gabbr2	gamma-aminobutyric acid (GABA) B receptor, 2	-0.462088	-0.496585
ENSMUSG00000021209	Ppp4r4	protein phosphatase 4, regulatory subunit 4	-0.402822	-0.432852
ENSMUSG00000028150	Rorc	RAR-related orphan receptor gamma	-0.543596	-0.581918
ENSMUSG00000032717	Mdfi	MyoD family inhibitor	-1.11349	-1.1904
ENSMUSG00000049709	Nlrp10	NLR family, pyrin domain containing 10	-0.453519	-0.484687
ENSMUSG00000047419	Cmya5	cardiomyopathy associated 5	-0.391771	-0.417197
ENSMUSG00000035929	H2-Q4	histocompatibility 2, Q region locus 4	0.479583	0.509925
ENSMUSG00000046215	Rprml	reprimo-like	-0.454519	-0.482354
ENSMUSG00000025854	Fam20c	family with sequence similarity 20, member C	-0.474701	-0.503652
ENSMUSG00000047642	D930020B18Rik	RIKEN cDNA D930020B18 gene	-0.669648	-0.708678
ENSMUSG00000026837	Col5a1	collagen, type V, alpha 1	-0.857292	-0.907053
ENSMUSG00000042708	Shcbp1l	Shc SH2-domain binding protein 1-like	-0.699473	-0.739982
ENSMUSG00000041479	Syt15	synaptotagmin XV	0.418247	0.442273
ENSMUSG00000016494	Cd34	CD34 antigen	0.481637	0.508865
ENSMUSG00000041930	Fam222a	family with sequence similarity 222, member A	-0.666563	-0.704066
ENSMUSG00000040479	Dgkz	diacylglycerol kinase zeta	-0.391166	-0.411807
ENSMUSG00000092083	Kcnb2	potassium voltage gated channel, Shab-related subfamily, member 2	0.713357	0.750637
ENSMUSG00000030350	Prmt8	protein arginine N-methyltransferase 8	-0.487504	-0.512456
ENSMUSG00000042678	Myo15	myosin XV	-1.36373	-1.43159
ENSMUSG00000027435	Cd93	CD93 antigen	0.405804	0.425724
ENSMUSG00000021265	Slc25a29	solute carrier family 25 (mitochondrial carrier, palmitoylcarnitine transporter), member 29	-0.456316	-0.478276
ENSMUSG00000037991	Rmi2	RecQ mediated genome instability 2	-0.722147	-0.756364
ENSMUSG00000017417	Plxdc1	plexin domain containing 1	-0.463549	-0.484098
ENSMUSG00000033579	Fa2h	fatty acid 2-hydroxylase	-0.48018	-0.501372
ENSMUSG00000073409	H2-Q6	histocompatibility 2, Q region locus 6	0.403323	0.421081
ENSMUSG00000032556	Bfsp2	beaded filament structural protein 2, phakinin	-0.509546	-0.531523
ENSMUSG00000090272	Mndal	myeloid nuclear differentiation antigen like	0.596683	0.622309
ENSMUSG00000070867	Trabd2b	TraB domain containing 2B	-0.899865	-0.938297
ENSMUSG00000056296	Synpr	synaptoporin	0.468754	0.488531
ENSMUSG00000025578	Cbx8	chromobox 8	0.400082	0.416941
ENSMUSG00000061718	Ppp1r1b	protein phosphatase 1, regulatory inhibitor subunit 1B	-0.429979	-0.446829
ENSMUSG00000060794	Tssk5	testis-specific serine kinase 5	-0.681427	-0.707711
ENSMUSG00000071379	Hpcal1	hippocalcin-like 1	-0.542907	-0.563579
ENSMUSG00000000214	Th	tyrosine hydroxylase	-0.985308	-1.02263
ENSMUSG00000036452	Arhgap26	Rho GTPase activating protein 26	-0.394883	-0.408067
ENSMUSG00000022053	Ebf2	early B cell factor 2	-0.388745	-0.400506
ENSMUSG00000036560	Lgi4	leucine-rich repeat LGI family, member 4	-0.388318	-0.399589
ENSMUSG00000029722	Agfg2	ArfGAP with FG repeats 2	-0.427008	-0.439351
ENSMUSG00000023046	Igfbp6	insulin-like growth factor binding protein 6	-0.389434	-0.400497
ENSMUSG00000020788	Atp2a3	ATPase, Ca++ transporting, ubiquitous	-0.521113	-0.534427
ENSMUSG00000018965	Ywhah	tyrosine 3-monooxygenase/tryptophan 5-monooxygenase activation protein, eta polypeptide	-0.510467	-0.521715
ENSMUSG00000004630	Pcp2	Purkinje cell protein 2 (L7)	-0.432305	-0.440868
ENSMUSG00000063193	Cd300lb	CD300 molecule like family member B	-0.513189	-0.521454
ENSMUSG00000012609	Ttll5	tubulin tyrosine ligase-like family, member 5	-0.422954	-0.429628
ENSMUSG00000043036	Ccdc63	coiled-coil domain containing 63	-0.875319	-0.889119
ENSMUSG00000002055	Spag5	sperm associated antigen 5	-0.696653	-0.706145
ENSMUSG00000027296	Itpka	inositol 1,4,5-trisphosphate 3-kinase A	-0.641142	-0.649868
ENSMUSG00000030137	Tuba8	tubulin, alpha 8	-0.563034	-0.570351
ENSMUSG00000050211	Pla2g4e	phospholipase A2, group IVE	0.454887	0.460474
ENSMUSG00000061232	H2-K1	histocompatibility 2, K1, K region	0.454663	0.460184
ENSMUSG00000028793	Rnf19b	ring finger protein 19B	-0.491784	-0.497227
ENSMUSG00000070462	Tlnrd1	talin rod domain containing 1	-0.429378	-0.433363
ENSMUSG00000036123	Slc9a3	solute carrier family 9 (sodium/hydrogen exchanger), member 3	-0.539615	-0.544538
ENSMUSG00000044244	Il20rb	interleukin 20 receptor beta	-0.886181	-0.894176
ENSMUSG00000038893	Fam117a	family with sequence similarity 117, member A	-1.11053	-1.11904
ENSMUSG00000046814	Gchfr	GTP cyclohydrolase I feedback regulator	-0.675413	-0.679545
ENSMUSG00000022519	Srl	sarcalumenin	-0.578998	-0.580931
ENSMUSG00000034098	Fstl5	follistatin-like 5	0.70895	0.708592
ENSMUSG00000060402	Chst8	carbohydrate sulfotransferase 8	-0.614581	-0.61325
ENSMUSG00000032452	Clstn2	calsyntenin 2	-0.672213	-0.669938
ENSMUSG00000028463	Car9	carbonic anhydrase 9	-1.50282	-1.49764
ENSMUSG00000066607	Insyn1	inhibitory synaptic factor 1	-0.434675	-0.431961
ENSMUSG00000024960	Plcb3	phospholipase C, beta 3	-0.80158	-0.796331
ENSMUSG00000020866	Cacna1g	calcium channel, voltage-dependent, T type, alpha 1G subunit	-0.400722	-0.397653
ENSMUSG00000021904	Sema3g	sema domain, immunoglobulin domain (Ig), short basic domain, secreted, (semaphorin) 3G	0.442615	0.438416
ENSMUSG00000062785	Kcnc3	potassium voltage gated channel, Shaw-related subfamily, member 3	-0.495453	-0.490258
ENSMUSG00000006398	Cdc20	cell division cycle 20	-0.561668	-0.554846
ENSMUSG00000042826	Fgf11	fibroblast growth factor 11	-0.508564	-0.502363
ENSMUSG00000049907	Rasl11b	RAS-like, family 11, member B	-0.41976	-0.414145
ENSMUSG00000024079	Eif2ak2	eukaryotic translation initiation factor 2-alpha kinase 2	0.464857	0.458408
ENSMUSG00000076431	Sox4	SRY (sex determining region Y)-box 4	0.508992	0.501923
ENSMUSG00000038843	Gcnt1	glucosaminyl (N-acetyl) transferase 1, core 2	-0.859171	-0.845824
ENSMUSG00000060550	H2-Q7	histocompatibility 2, Q region locus 7	0.57057	0.561016
ENSMUSG00000021071	Trim9	tripartite motif-containing 9	-0.493784	-0.485503
ENSMUSG00000057606	Colq	collagen-like tail subunit (single strand of homotrimer) of asymmetric acetylcholinesterase	-0.478308	-0.47016
ENSMUSG00000039997	Ifi203	interferon activated gene 203	0.53926	0.529904
ENSMUSG00000034845	Plvap	plasmalemma vesicle associated protein	-0.618285	-0.60743
ENSMUSG00000001435	Col18a1	collagen, type XVIII, alpha 1	-0.668681	-0.6561
ENSMUSG00000074736	Syndig1	synapse differentiation inducing 1	-0.462645	-0.45375
ENSMUSG00000038860	Garnl3	GTPase activating RANGAP domain-like 3	-0.520828	-0.510756
ENSMUSG00000014198	Zfp385c	zinc finger protein 385C	-0.455424	-0.446068
ENSMUSG00000017390	Aldoc	aldolase C, fructose-bisphosphate	-0.629885	-0.615245
ENSMUSG00000094626	Tmem121b	transmembrane protein 121B	-0.409371	-0.399806
ENSMUSG00000055945	Prr18	proline rich 18	-0.480077	-0.468196
ENSMUSG00000030351	Tspan11	tetraspanin 11	-0.434781	-0.423925
ENSMUSG00000103255	Pcdhac1	protocadherin alpha subfamily C, 1	-0.438732	-0.427748
ENSMUSG00000040105	Plpp6	phospholipid phosphatase 6	-0.414189	-0.403458
ENSMUSG00000091402	Rd3l	retinal degeneration 3-like	-0.398678	-0.388166
ENSMUSG00000024104	Washc2	WASH complex subunit 2`	-0.456487	-0.442889
ENSMUSG00000040483	Xaf1	XIAP associated factor 1	0.491827	0.476625
ENSMUSG00000042671	Rgs8	regulator of G-protein signaling 8	-0.757025	-0.7323
ENSMUSG00000021319	Sfrp4	secreted frizzled-related protein 4	0.714475	0.690062
ENSMUSG00000053930	Shisa6	shisa family member 6	-0.474169	-0.457693
ENSMUSG00000020848	Doc2b	double C2, beta	-0.590453	-0.569791
ENSMUSG00000021097	Clmn	calmin	-0.487373	-0.470266
ENSMUSG00000053199	Arhgap20	Rho GTPase activating protein 20	-0.592291	-0.570317
ENSMUSG00000030946	Lhpp	phospholysine phosphohistidine inorganic pyrophosphate phosphatase	-0.518344	-0.498964
ENSMUSG00000022935	Grik1	glutamate receptor, ionotropic, kainate 1	-0.499646	-0.48091
ENSMUSG00000027931	Npr1	natriuretic peptide receptor 1	-0.66883	-0.643576
ENSMUSG00000024743	Syt7	synaptotagmin VII	-0.422469	-0.405917
ENSMUSG00000038507	Parp12	poly (ADP-ribose) polymerase family, member 12	0.412771	0.396088
ENSMUSG00000038840	Birc7	baculoviral IAP repeat-containing 7 (livin)	-0.411105	-0.394308
ENSMUSG00000046834	Krt1	keratin 1	-0.409007	-0.392104
ENSMUSG00000066438	Plekhd1	pleckstrin homology domain containing, family D (with coiled-coil domains) member 1	-0.441211	-0.422478
ENSMUSG00000031955	Bcar1	breast cancer anti-estrogen resistance 1	-0.51637	-0.493753
ENSMUSG00000041372	B4galnt3	beta-1,4-N-acetyl-galactosaminyl transferase 3	-0.665967	-0.636619
ENSMUSG00000068154	Insm1	insulinoma-associated 1	0.450452	0.429585
ENSMUSG00000022272	Myo10	myosin X	-0.516072	-0.491918
ENSMUSG00000027562	Car2	carbonic anhydrase 2	-0.648244	-0.617614
ENSMUSG00000078670	Fam174b	family with sequence similarity 174, member B	-0.526342	-0.500647
ENSMUSG00000025739	Gng13	guanine nucleotide binding protein (G protein), gamma 13	-0.820919	-0.779745
ENSMUSG00000049252	Lrp1b	low density lipoprotein-related protein 1B	0.551444	0.523484
ENSMUSG00000039059	Hrh3	histamine receptor H3	-0.454431	-0.431259
ENSMUSG00000039662	Icmt	isoprenylcysteine carboxyl methyltransferase	-0.630816	-0.598348
ENSMUSG00000027397	Slc20a1	solute carrier family 20, member 1	-0.430551	-0.40788
ENSMUSG00000034765	Dusp5	dual specificity phosphatase 5	-0.798586	-0.755027
ENSMUSG00000024810	Il33	interleukin 33	-0.871162	-0.823486
ENSMUSG00000024538	Ppic	peptidylprolyl isomerase C	0.462913	0.43756
ENSMUSG00000069662	Marcks	myristoylated alanine rich protein kinase C substrate	0.537853	0.507978
ENSMUSG00000023047	Amhr2	anti-Mullerian hormone type 2 receptor	-0.477528	-0.450623
ENSMUSG00000031425	Plp1	proteolipid protein (myelin) 1	-0.637663	-0.601495
ENSMUSG00000045404	Kcnk13	potassium channel, subfamily K, member 13	-0.753542	-0.709022
ENSMUSG00000068758	Il3ra	interleukin 3 receptor, alpha chain	0.815532	0.766793
ENSMUSG00000067028	Cntnap5b	contactin associated protein-like 5B	-0.700119	-0.657147
ENSMUSG00000037348	Paqr7	progestin and adipoQ receptor family member VII	-0.49305	-0.462596
ENSMUSG00000057914	Cacnb2	calcium channel, voltage-dependent, beta 2 subunit	-0.47976	-0.449991
ENSMUSG00000022075	Rhobtb2	Rho-related BTB domain containing 2	-0.605709	-0.567077
ENSMUSG00000048534	Jaml	junction adhesion molecule like	-0.45678	-0.427596
ENSMUSG00000089669	Tnfsf13	tumor necrosis factor (ligand) superfamily, member 13	-0.479527	-0.447617
ENSMUSG00000054690	Emcn	endomucin	0.458155	0.427461
ENSMUSG00000003573	Homer3	homer scaffolding protein 3	-0.574867	-0.536135
ENSMUSG00000027716	Trpc3	transient receptor potential cation channel, subfamily C, member 3	-0.617382	-0.574996
ENSMUSG00000040713	Creg1	cellular repressor of E1A-stimulated genes 1	-0.527826	-0.489869
ENSMUSG00000010825	Grid2ip	glutamate receptor, ionotropic, delta 2 (Grid2) interacting protein 1	-0.921882	-0.85497
ENSMUSG00000073542	Cep76	centrosomal protein 76	-0.795392	-0.736962
ENSMUSG00000032854	Ugt8a	UDP galactosyltransferase 8A	-0.60103	-0.555282
ENSMUSG00000040372	Gpr63	G protein-coupled receptor 63	-0.660727	-0.609924
ENSMUSG00000037579	Kcnh3	potassium voltage-gated channel, subfamily H (eag-related), member 3	-0.95248	-0.879221
ENSMUSG00000027611	Procr	protein C receptor, endothelial	-0.638249	-0.588942
ENSMUSG00000005220	Corin	corin, serine peptidase	-0.592649	-0.546461
ENSMUSG00000041261	Car8	carbonic anhydrase 8	-0.475712	-0.438202
ENSMUSG00000059811	Atl2	atlastin GTPase 2	-0.564353	-0.518806
ENSMUSG00000035735	Dagla	diacylglycerol lipase, alpha	-0.72201	-0.663451
ENSMUSG00000021572	Cep72	centrosomal protein 72	-0.619591	-0.56901
ENSMUSG00000028360	Slc44a5	solute carrier family 44, member 5	0.559034	0.511865
ENSMUSG00000026655	Fam107b	family with sequence similarity 107, member B	-1.01154	-0.926092
ENSMUSG00000037541	Shank2	SH3 and multiple ankyrin repeat domains 2	-0.49705	-0.454052
ENSMUSG00000032446	Eomes	eomesodermin	-0.72962	-0.664897
ENSMUSG00000005198	Polr2a	polymerase (RNA) II (DNA directed) polypeptide A	0.482179	0.438615
ENSMUSG00000090223	Pcp4	Purkinje cell protein 4	-0.581002	-0.528423
ENSMUSG00000035891	Cerk	ceramide kinase	-0.435167	-0.395479
ENSMUSG00000049744	Arhgap15	Rho GTPase activating protein 15	0.562115	0.509309
ENSMUSG00000037754	Ppp1r16b	protein phosphatase 1, regulatory subunit 16B	-0.723318	-0.654695
ENSMUSG00000045991	Onecut2	one cut domain, family member 2	0.514406	0.464239
ENSMUSG00000037295	Ldlrap1	low density lipoprotein receptor adaptor protein 1	-0.431667	-0.389525
ENSMUSG00000036617	Etl4	enhancer trap locus 4	-0.490602	-0.442445
ENSMUSG00000038077	Kcna6	potassium voltage-gated channel, shaker-related, subfamily, member 6	-0.474791	-0.42673
ENSMUSG00000043079	Synpo	synaptopodin	-0.456945	-0.410136
ENSMUSG00000054901	Arhgef33	Rho guanine nucleotide exchange factor (GEF) 33	-0.697693	-0.62605
ENSMUSG00000030662	Ipo5	importin 5	-0.481914	-0.432411
ENSMUSG00000053965	Pde5a	phosphodiesterase 5A, cGMP-specific	-0.634254	-0.568327
ENSMUSG00000028631	Kcnq4	potassium voltage-gated channel, subfamily Q, member 4	-0.569833	-0.510421
ENSMUSG00000037921	Ddx60	DEAD (Asp-Glu-Ala-Asp) box polypeptide 60	0.483737	0.431276
ENSMUSG00000045441	Gprin3	GPRIN family member 3	0.542142	0.482066
ENSMUSG00000057457	Phex	phosphate regulating endopeptidase homolog, X-linked	0.480484	0.427108
ENSMUSG00000025492	Ifitm3	interferon induced transmembrane protein 3	0.444001	0.393593
ENSMUSG00000029467	Atp2a2	ATPase, Ca++ transporting, cardiac muscle, slow twitch 2	-0.486356	-0.43053
ENSMUSG00000033880	Lgals3bp	lectin, galactoside-binding, soluble, 3 binding protein	0.43752	0.385551
ENSMUSG00000036766	Dner	delta/notch-like EGF repeat containing	-0.489174	-0.429241
ENSMUSG00000059327	Eda	ectodysplasin-A	-0.684382	-0.599698
ENSMUSG00000022237	Ankrd33b	ankyrin repeat domain 33B	-0.443689	-0.387408
ENSMUSG00000034731	Dgkh	diacylglycerol kinase, eta	-0.497478	-0.434342
ENSMUSG00000032501	Trib1	tribbles pseudokinase 1	-0.577011	-0.501412
ENSMUSG00000014782	Plekhg4	pleckstrin homology domain containing, family G (with RhoGef domain) member 4	-0.674729	-0.585873
ENSMUSG00000026185	Igfbp5	insulin-like growth factor binding protein 5	-1.02096	-0.886484
ENSMUSG00000039936	Pik3cd	phosphatidylinositol-4,5-bisphosphate 3-kinase catalytic subunit delta	0.491842	0.42684
ENSMUSG00000027009	Itga4	integrin alpha 4	0.609837	0.5265
ENSMUSG00000029595	Lhx5	LIM homeobox protein 5	-0.665921	-0.574769
ENSMUSG00000032572	Col6a4	collagen, type VI, alpha 4	0.514091	0.443553
ENSMUSG00000090061	Nwd2	NACHT and WD repeat domain containing 2	-0.484623	-0.418083
ENSMUSG00000042978	Sbk1	SH3-binding kinase 1	-0.773148	-0.666473
ENSMUSG00000034773	Hrob	homologous recombination factor with OB-fold	0.546259	0.468482
ENSMUSG00000030303	Far2	fatty acyl CoA reductase 2	-0.487421	-0.416137
ENSMUSG00000025432	Avil	advillin	-0.66967	-0.571674
ENSMUSG00000044734	Serpinb1a	serine (or cysteine) peptidase inhibitor, clade B, member 1a	-0.705609	-0.600857
ENSMUSG00000027386	Fbln7	fibulin 7	-0.68259	-0.580889
ENSMUSG00000010461	Eya4	EYA transcriptional coactivator and phosphatase 4	0.507421	0.431482
ENSMUSG00000045246	Kcng4	potassium voltage-gated channel, subfamily G, member 4	-0.48417	-0.41157
ENSMUSG00000025477	Inpp5a	inositol polyphosphate-5-phosphatase A	-0.542532	-0.460819
ENSMUSG00000029126	Nsg1	neuron specific gene family member 1	-0.486296	-0.411074
ENSMUSG00000026094	Stk17b	serine/threonine kinase 17b (apoptosis-inducing)	-0.636435	-0.537235
ENSMUSG00000044320	1700001O22Rik	RIKEN cDNA 1700001O22 gene	-0.655796	-0.553509
ENSMUSG00000043903	Zfp469	zinc finger protein 469	0.468713	0.394705
ENSMUSG00000098557	Kctd12	potassium channel tetramerisation domain containing 12	-0.890723	-0.749841
ENSMUSG00000020644	Id2	inhibitor of DNA binding 2	-0.492011	-0.41247
ENSMUSG00000052331	Ankrd44	ankyrin repeat domain 44	0.589099	0.489267
ENSMUSG00000049493	Pls1	plastin 1 (I-isoform)	-0.514884	-0.426272
ENSMUSG00000038264	Sema7a	sema domain, immunoglobulin domain (Ig), and GPI membrane anchor, (semaphorin) 7A	-0.546895	-0.450228
ENSMUSG00000034987	Hrh2	histamine receptor H2	-1.01306	-0.829848
ENSMUSG00000029026	Trp73	transformation related protein 73	-0.501732	-0.409928
ENSMUSG00000059013	Sh2d3c	SH2 domain containing 3C	0.542757	0.441656
ENSMUSG00000021676	Iqgap2	IQ motif containing GTPase activating protein 2	0.499603	0.404026
ENSMUSG00000033355	Rtp4	receptor transporter protein 4	0.537288	0.4333
ENSMUSG00000031849	Comp	cartilage oligomeric matrix protein	0.683868	0.549231
ENSMUSG00000025498	Irf7	interferon regulatory factor 7	0.590051	0.471869
ENSMUSG00000027674	Pex5l	peroxisomal biogenesis factor 5-like	-0.52614	-0.419361
ENSMUSG00000032532	Cck	cholecystokinin	-0.804703	-0.630924
ENSMUSG00000026525	Opn3	opsin 3	-1.19907	-0.939881
ENSMUSG00000079017	Ifi27l2a	interferon, alpha-inducible protein 27 like 2A	0.695517	0.540724
ENSMUSG00000052276	Ostn	osteocrin	-1.12079	-0.867453
ENSMUSG00000005950	P2rx5	purinergic receptor P2X, ligand-gated ion channel, 5	-0.501756	-0.387993
ENSMUSG00000059456	Ptk2b	PTK2 protein tyrosine kinase 2 beta	-0.675825	-0.520254
ENSMUSG00000039714	Cplx3	complexin 3	-0.561454	-0.429848
ENSMUSG00000031374	Zfp92	zinc finger protein 92	0.561853	0.427231
ENSMUSG00000090461	Iltifb	interleukin 10-related T cell-derived inducible factor beta	-0.583382	-0.441852
ENSMUSG00000006235	Epor	erythropoietin receptor	-0.84243	-0.635495
ENSMUSG00000055409	Nell1	NEL-like 1	-0.614305	-0.461597
ENSMUSG00000017400	Stac2	SH3 and cysteine rich domain 2	-0.603232	-0.442202
ENSMUSG00000023192	Grm2	glutamate receptor, metabotropic 2	-0.680503	-0.480145
ENSMUSG00000047109	Cldn14	claudin 14	0.591583	0.415135
ENSMUSG00000049107	Ntf3	neurotrophin 3	0.834241	0.58503
ENSMUSG00000036915	Kirrel2	kirre like nephrin family adhesion molecule 2	0.600924	0.416757
ENSMUSG00000053007	Creb5	cAMP responsive element binding protein 5	0.647781	0.445996
ENSMUSG00000031628	Casp3	caspase 3	0.706824	0.478587
ENSMUSG00000046607	Hrk	harakiri, BCL2 interacting protein (contains only BH3 domain)	0.918455	0.613051
ENSMUSG00000003545	Fosb	FBJ osteosarcoma oncogene B	-0.671907	-0.438235
ENSMUSG00000066189	Cacng3	calcium channel, voltage-dependent, gamma subunit 3	-0.664862	n.s.
ENSMUSG00000046480	Scn4b	sodium channel, type IV, beta	-0.643005	n.s.
ENSMUSG00000032338	Hcn4	hyperpolarization-activated, cyclic nucleotide-gated K+ 4	-0.597902	n.s.
ENSMUSG00000058183	Mmel1	membrane metallo-endopeptidase-like 1	-0.595695	n.s.
ENSMUSG00000031139	Mcf2	mcf.2 transforming sequence	-0.586119	n.s.
ENSMUSG00000051029	Serpinb1b	serine (or cysteine) peptidase inhibitor, clade B, member 1b	-0.58518	n.s.
ENSMUSG00000042540	Acot5	acyl-CoA thioesterase 5	-0.575315	n.s.
ENSMUSG00000036006	Ripor2	RHO family interacting cell polarization regulator 2	-0.571126	n.s.
ENSMUSG00000003032	Klf4	Kruppel-like factor 4 (gut)	-0.55027	n.s.
ENSMUSG00000013766	Ly6g6e	lymphocyte antigen 6 complex, locus G6E	-0.542234	n.s.
ENSMUSG00000030004	Nat8	N-acetyltransferase 8 (GCN5-related)	-0.534485	n.s.
ENSMUSG00000009075	Cabp7	calcium binding protein 7	-0.527539	n.s.
ENSMUSG00000049511	Htr1b	5-hydroxytryptamine (serotonin) receptor 1B	-0.516745	n.s.
ENSMUSG00000031837	Necab2	N-terminal EF-hand calcium binding protein 2	-0.504696	n.s.
ENSMUSG00000032946	Rasgrp2	RAS, guanyl releasing protein 2	-0.503978	n.s.
ENSMUSG00000018554	Ybx2	Y box protein 2	-0.500591	n.s.
ENSMUSG00000037583	Nr0b2	nuclear receptor subfamily 0, group B, member 2	-0.490319	n.s.
ENSMUSG00000034472	Rasd2	RASD family, member 2	-0.489967	n.s.
ENSMUSG00000027359	Slc27a2	solute carrier family 27 (fatty acid transporter), member 2	-0.489755	n.s.
ENSMUSG00000024617	Camk2a	calcium/calmodulin-dependent protein kinase II alpha	-0.482407	n.s.
ENSMUSG00000038292	Ccdc155	coiled-coil domain containing 155	-0.478304	n.s.
ENSMUSG00000039058	Ak5	adenylate kinase 5	-0.471155	n.s.
ENSMUSG00000031283	Chrdl1	chordin-like 1	-0.467417	n.s.
ENSMUSG00000027270	Lamp5	lysosomal-associated membrane protein family, member 5	-0.467062	n.s.
ENSMUSG00000003812	Dnase2a	deoxyribonuclease II alpha	-0.465058	n.s.
ENSMUSG00000000263	Glra1	glycine receptor, alpha 1 subunit	-0.46472	n.s.
ENSMUSG00000026303	Mlph	melanophilin	-0.462727	n.s.
ENSMUSG00000037161	Mgarp	mitochondria localized glutamic acid rich protein	-0.456897	n.s.
ENSMUSG00000028654	Mycl	v-myc avian myelocytomatosis viral oncogene lung carcinoma derived	-0.456806	n.s.
ENSMUSG00000032517	Mobp	myelin-associated oligodendrocytic basic protein	-0.45452	n.s.
ENSMUSG00000059991	Nptx2	neuronal pentraxin 2	-0.453903	n.s.
ENSMUSG00000100486	Gm4131	predicted gene 4131	-0.449637	n.s.
ENSMUSG00000050022	Amz1	archaelysin family metallopeptidase 1	-0.448402	n.s.
ENSMUSG00000058260	Serpina9	serine (or cysteine) peptidase inhibitor, clade A (alpha-1 antiproteinase, antitrypsin), member 9	-0.447069	n.s.
ENSMUSG00000027375	Mal	myelin and lymphocyte protein, T cell differentiation protein	-0.445656	n.s.
ENSMUSG00000056486	Chn1	chimerin 1	-0.442611	n.s.
ENSMUSG00000056457	Prl2c3	prolactin family 2, subfamily c, member 3	-0.440975	n.s.
ENSMUSG00000031883	Car7	carbonic anhydrase 7	-0.437963	n.s.
ENSMUSG00000021747	4930452B06Rik	RIKEN cDNA 4930452B06 gene	-0.437934	n.s.
ENSMUSG00000022353	Mtss1	MTSS I-BAR domain containing 1	-0.437708	n.s.
ENSMUSG00000033491	Prss35	protease, serine 35	-0.436484	n.s.
ENSMUSG00000041608	Entpd3	ectonucleoside triphosphate diphosphohydrolase 3	-0.434736	n.s.
ENSMUSG00000025401	Myo1a	myosin IA	-0.431892	n.s.
ENSMUSG00000028222	Calb1	calbindin 1	-0.431565	n.s.
ENSMUSG00000063626	Unc5d	unc-5 netrin receptor D	-0.43072	n.s.
ENSMUSG00000021098	4930447C04Rik	RIKEN cDNA 4930447C04 gene	-0.430714	n.s.
ENSMUSG00000049649	Gpr3	G-protein coupled receptor 3	-0.42863	n.s.
ENSMUSG00000000861	Bcl11a	B cell CLL/lymphoma 11A (zinc finger protein)	-0.423535	n.s.
ENSMUSG00000063142	Kcnma1	potassium large conductance calcium-activated channel, subfamily M, alpha member 1	-0.423496	n.s.
ENSMUSG00000070730	Rmdn3	regulator of microtubule dynamics 3	-0.422213	n.s.
ENSMUSG00000030276	Ttll3	tubulin tyrosine ligase-like family, member 3	-0.42217	n.s.
ENSMUSG00000049892	Rasd1	RAS, dexamethasone-induced 1	-0.420552	n.s.
ENSMUSG00000031448	Adprhl1	ADP-ribosylhydrolase like 1	-0.420431	n.s.
ENSMUSG00000025384	Faap100	Fanconi anemia core complex associated protein 100	-0.415667	n.s.
ENSMUSG00000032303	Chrna3	cholinergic receptor, nicotinic, alpha polypeptide 3	-0.414222	n.s.
ENSMUSG00000030898	Cckbr	cholecystokinin B receptor	-0.414156	n.s.
ENSMUSG00000030098	Grip2	glutamate receptor interacting protein 2	-0.41369	n.s.
ENSMUSG00000044139	Prss53	protease, serine 53	-0.412641	n.s.
ENSMUSG00000026697	Myoc	myocilin	-0.409924	n.s.
ENSMUSG00000035211	Xrra1	X-ray radiation resistance associated 1	-0.40988	n.s.
ENSMUSG00000062991	Nrg1	neuregulin 1	-0.409644	n.s.
ENSMUSG00000030102	Itpr1	inositol 1,4,5-trisphosphate receptor 1	-0.406825	n.s.
ENSMUSG00000091844	Gm8251	predicted gene 8251	-0.406393	n.s.
ENSMUSG00000036264	Fstl4	follistatin-like 4	-0.405626	n.s.
ENSMUSG00000028946	Hes3	hes family bHLH transcription factor 3	-0.405514	n.s.
ENSMUSG00000022769	Sdf2l1	stromal cell-derived factor 2-like 1	-0.405488	n.s.
ENSMUSG00000055148	Klf2	Kruppel-like factor 2 (lung)	-0.405396	n.s.
ENSMUSG00000045288	Ush1g	USH1 protein network component sans	-0.405254	n.s.
ENSMUSG00000095276	Gfy	golgi-associated olfactory signaling regulator	-0.405205	n.s.
ENSMUSG00000039546	Ajap1	adherens junction associated protein 1	-0.404718	n.s.
ENSMUSG00000032020	Ubash3b	ubiquitin associated and SH3 domain containing, B	-0.402459	n.s.
ENSMUSG00000048616	Nog	noggin	-0.40178	n.s.
ENSMUSG00000023034	Nr4a1	nuclear receptor subfamily 4, group A, member 1	-0.401194	n.s.
ENSMUSG00000029088	Kcnip4	Kv channel interacting protein 4	-0.401162	n.s.
ENSMUSG00000035355	Kcnh4	potassium voltage-gated channel, subfamily H (eag-related), member 4	-0.400856	n.s.
ENSMUSG00000027858	Tspan2	tetraspanin 2	-0.397977	n.s.
ENSMUSG00000026773	Pfkfb3	6-phosphofructo-2-kinase/fructose-2,6-biphosphatase 3	-0.397004	n.s.
ENSMUSG00000023991	Foxp4	forkhead box P4	-0.395391	n.s.
ENSMUSG00000048644	Ctxn1	cortexin 1	-0.395341	n.s.
ENSMUSG00000012819	Cdh23	cadherin 23 (otocadherin)	-0.395331	n.s.
ENSMUSG00000069911	Insyn2b	inhibitory synaptic factor family member 2B	-0.395086	n.s.
ENSMUSG00000053519	Kcnip1	Kv channel-interacting protein 1	-0.394685	n.s.
ENSMUSG00000030222	Rerg	RAS-like, estrogen-regulated, growth-inhibitor	-0.393811	n.s.
ENSMUSG00000029075	Tnfrsf4	tumor necrosis factor receptor superfamily, member 4	-0.393577	n.s.
ENSMUSG00000015806	Qdpr	quinoid dihydropteridine reductase	-0.393154	n.s.
ENSMUSG00000078521	Aunip	aurora kinase A and ninein interacting protein	-0.392635	n.s.
ENSMUSG00000030307	Slc6a11	solute carrier family 6 (neurotransmitter transporter, GABA), member 11	-0.391116	n.s.
ENSMUSG00000033278	Ptprm	protein tyrosine phosphatase, receptor type, M	-0.389993	n.s.
ENSMUSG00000026622	Nek2	NIMA (never in mitosis gene a)-related expressed kinase 2	-0.387968	n.s.
ENSMUSG00000045672	Col27a1	collagen, type XXVII, alpha 1	-0.386562	n.s.
ENSMUSG00000007594	Hapln4	hyaluronan and proteoglycan link protein 4	-0.386254	n.s.
ENSMUSG00000017631	Abr	active BCR-related gene	-0.385496	n.s.
ENSMUSG00000033847	Pla2g4c	phospholipase A2, group IVC (cytosolic, calcium-independent)	-0.385413	n.s.
ENSMUSG00000030226	Lmo3	LIM domain only 3	-0.385173	n.s.
ENSMUSG00000028037	Ifi44	interferon-induced protein 44	0.386233	n.s.
ENSMUSG00000068876	Cgn	cingulin	0.386557	n.s.
ENSMUSG00000032890	Rims3	regulating synaptic membrane exocytosis 3	0.387534	n.s.
ENSMUSG00000060802	B2m	beta-2 microglobulin	0.389238	n.s.
ENSMUSG00000031756	Cenpn	centromere protein N	0.390168	n.s.
ENSMUSG00000039457	Ppl	periplakin	0.391358	n.s.
ENSMUSG00000024526	Cidea	cell death-inducing DNA fragmentation factor, alpha subunit-like effector A	0.399012	n.s.
ENSMUSG00000006574	Slc4a1	solute carrier family 4 (anion exchanger), member 1	0.399712	n.s.
ENSMUSG00000052684	Jun	jun proto-oncogene	0.401353	n.s.
ENSMUSG00000020227	Irak3	interleukin-1 receptor-associated kinase 3	0.4025	n.s.
ENSMUSG00000003206	Ebi3	Epstein-Barr virus induced gene 3	0.402793	n.s.
ENSMUSG00000054083	Capn12	calpain 12	0.405103	n.s.
ENSMUSG00000027379	Bub1	BUB1, mitotic checkpoint serine/threonine kinase	0.407953	n.s.
ENSMUSG00000019933	Mrln	myoregulin	0.41113	n.s.
ENSMUSG00000073491	Ifi213	interferon activated gene 213	0.411486	n.s.
ENSMUSG00000053897	Slc39a8	solute carrier family 39 (metal ion transporter), member 8	0.411532	n.s.
ENSMUSG00000046287	Pnma3	paraneoplastic antigen MA3	0.411632	n.s.
ENSMUSG00000026222	Sp100	nuclear antigen Sp100	0.41226	n.s.
ENSMUSG00000048677	Tpcn2	two pore segment channel 2	0.412947	n.s.
ENSMUSG00000000555	Itga5	integrin alpha 5 (fibronectin receptor alpha)	0.41582	n.s.
ENSMUSG00000068129	Cst7	cystatin F (leukocystatin)	0.416011	n.s.
ENSMUSG00000029561	Oasl2	2'-5' oligoadenylate synthetase-like 2	0.418883	n.s.
ENSMUSG00000041741	Pde3a	phosphodiesterase 3A, cGMP inhibited	0.419524	n.s.
ENSMUSG00000024338	Psmb8	proteasome (prosome, macropain) subunit, beta type 8 (large multifunctional peptidase 7)	0.419755	n.s.
ENSMUSG00000078607	1810010H24Rik	RIKEN cDNA 1810010H24 gene	0.425712	n.s.
ENSMUSG00000020831	0610010K14Rik	RIKEN cDNA 0610010K14 gene	0.426356	n.s.
ENSMUSG00000071547	Nt5dc2	5'-nucleotidase domain containing 2	0.433066	n.s.
ENSMUSG00000054435	Gimap4	GTPase, IMAP family member 4	0.433571	n.s.
ENSMUSG00000022876	Samsn1	SAM domain, SH3 domain and nuclear localization signals, 1	0.439595	n.s.
ENSMUSG00000022216	Psme1	proteasome (prosome, macropain) activator subunit 1 (PA28 alpha)	0.441568	n.s.
ENSMUSG00000052353	Cemip	cell migration inducing protein, hyaluronan binding	0.443182	n.s.
ENSMUSG00000007030	Vwa7	von Willebrand factor A domain containing 7	0.453206	n.s.
ENSMUSG00000025064	Col17a1	collagen, type XVII, alpha 1	0.456683	n.s.
ENSMUSG00000045312	Lhfpl2	lipoma HMGIC fusion partner-like 2	0.463945	n.s.
ENSMUSG00000004110	Cacna1e	calcium channel, voltage-dependent, R type, alpha 1E subunit	0.465261	n.s.
ENSMUSG00000005107	Slc2a9	solute carrier family 2 (facilitated glucose transporter), member 9	0.471625	n.s.
ENSMUSG00000026315	Serpinb8	serine (or cysteine) peptidase inhibitor, clade B, member 8	0.47357	n.s.
ENSMUSG00000109372	Gm19410	predicted gene, 19410	0.475408	n.s.
ENSMUSG00000026141	Col19a1	collagen, type XIX, alpha 1	0.482312	n.s.
ENSMUSG00000034115	Scn11a	sodium channel, voltage-gated, type XI, alpha	0.490438	n.s.
ENSMUSG00000053399	Adamts18	a disintegrin-like and metallopeptidase (reprolysin type) with thrombospondin type 1 motif, 18	0.496192	n.s.
ENSMUSG00000063060	Sox7	SRY (sex determining region Y)-box 7	0.509359	n.s.
ENSMUSG00000004948	Zp3	zona pellucida glycoprotein 3	0.510651	n.s.
ENSMUSG00000057378	Ryr3	ryanodine receptor 3	0.516523	n.s.
ENSMUSG00000033149	Phldb2	pleckstrin homology like domain, family B, member 2	0.627061	n.s.
ENSMUSG00000028370	Pappa	pregnancy-associated plasma protein A	0.70755	n.s.
n.s. : not significant, as adjusted p-value > 0.05 or |Log2 fold change (FC)| < 0.385
